# Supplementary material for: Atomic-layered metal–organic framework on NiFe LDH for enhanced electrocatalytic oxygen evolution reaction
Source: Royal Society of Chemistry journal article supplement (doi:10.1039/d3gc03854h), 2023-12-29
Supplement: d3gc03854h1.pdf [file d3gc03854h1.pdf]

## Supporting information

### **Atomic layered metal-organic framework on NiFe LDH for enhanced electrocatalytic oxygen evolution reaction**

Dan Xu,<sup>‡a</sup> Yingying Gao,<sup>‡a</sup> Sheng Qian,<sup>a</sup> Yu Fan,<sup>a</sup> Jingqi Tian<sup>\*a</sup>

<sup>a</sup> *School of Chemistry and Chemical Engineering, and Institute for Innovative*

*Materials and Energy, Yangzhou University, 180 Si-Wang-Ting Road, Yangzhou*

*225002, P. R. China*

\*Corresponding author.

*E-mail address:* tianjq@yzu.edu.cn (J. Tian)

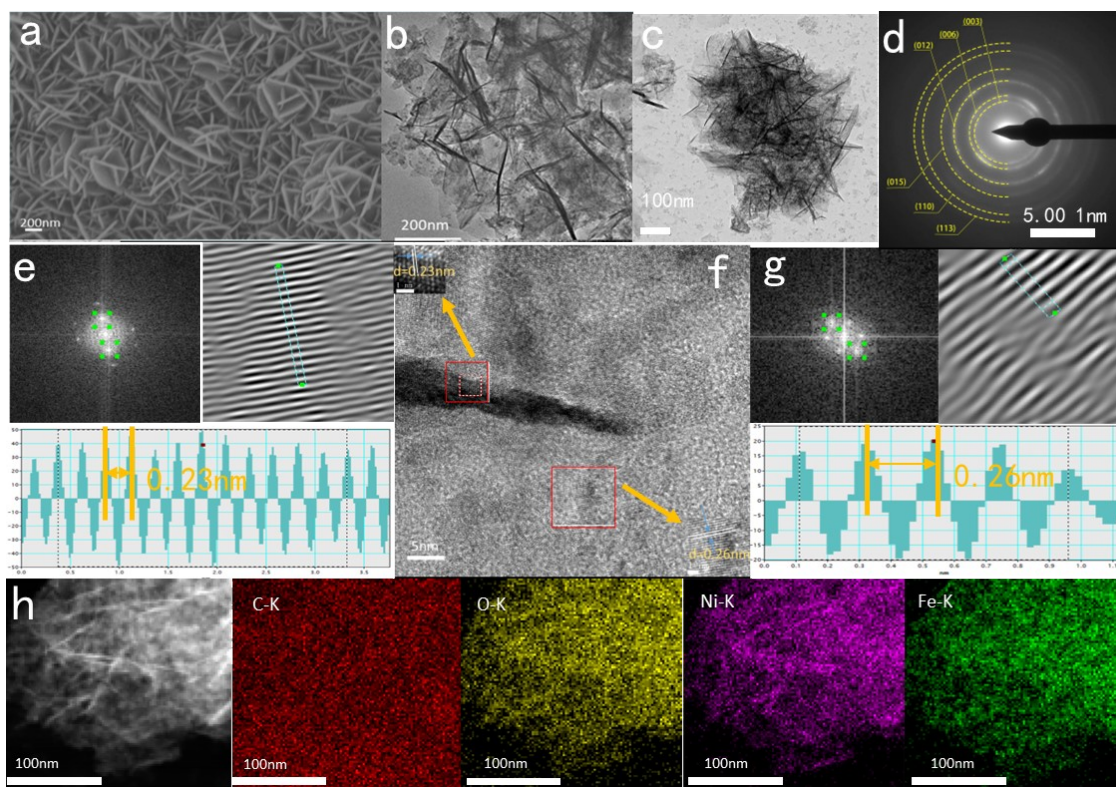

**Fig. S1.** (a) SEM image, (b, c) TEM image, (d) SAED image, (e-g) HRTEM images, (h) STEM image and elemental mappings of NiFe LDH nanosheets.

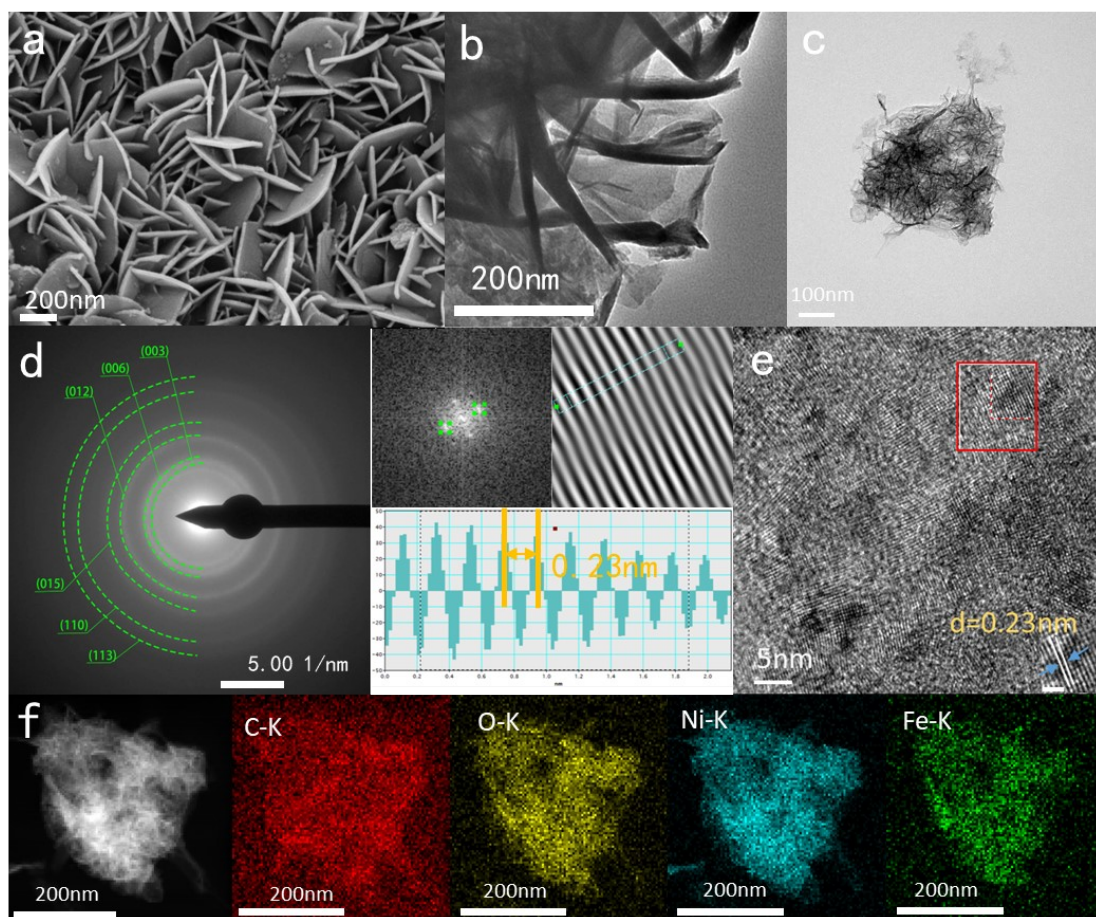

**Fig. S2.** (a) SEM image, (b, c) TEM image, (d) SAED image, (e-g) HRTEM images, (h) STEM image and elemental mappings of NiFe LDH@MOF-1.

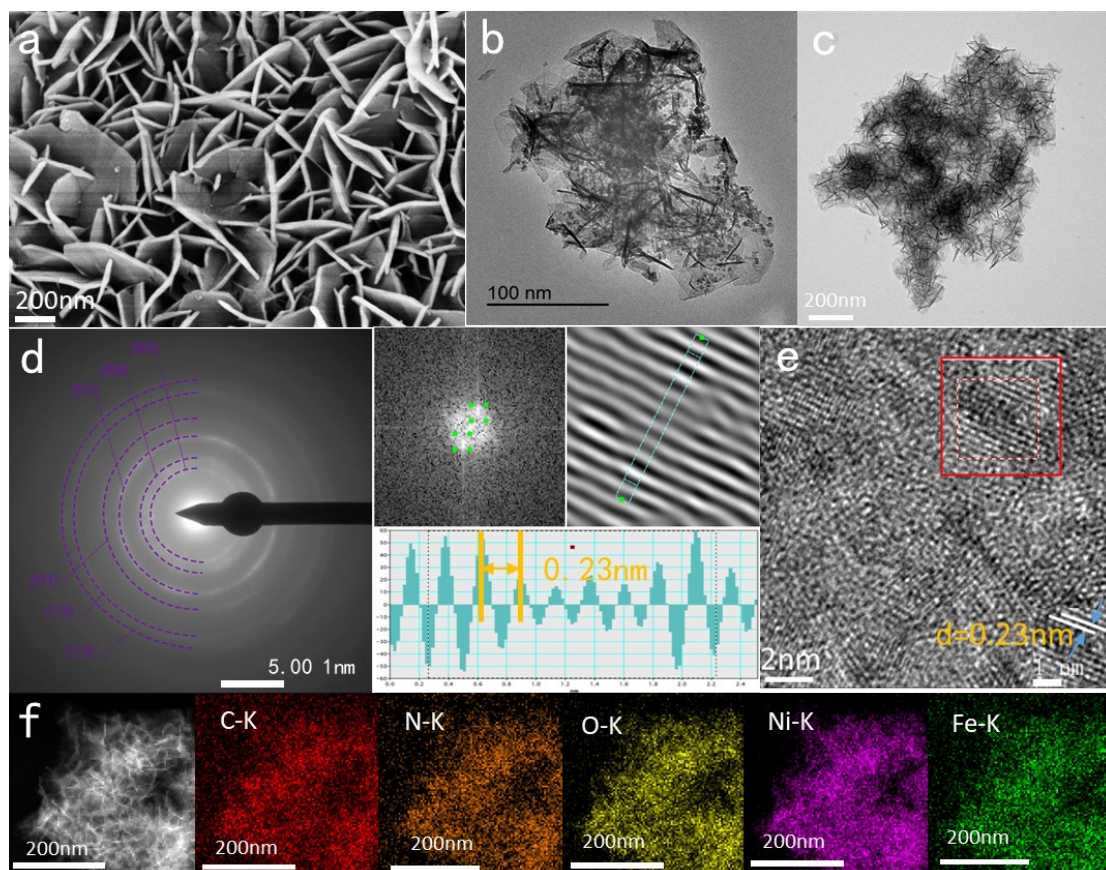

**Fig. S3.** (a) SEM image, (b, c) TEM image, (d) SAED image, (e-g) HRTEM images, (h) STEM image and elemental mappings of NiFe LDH@MOF-2.

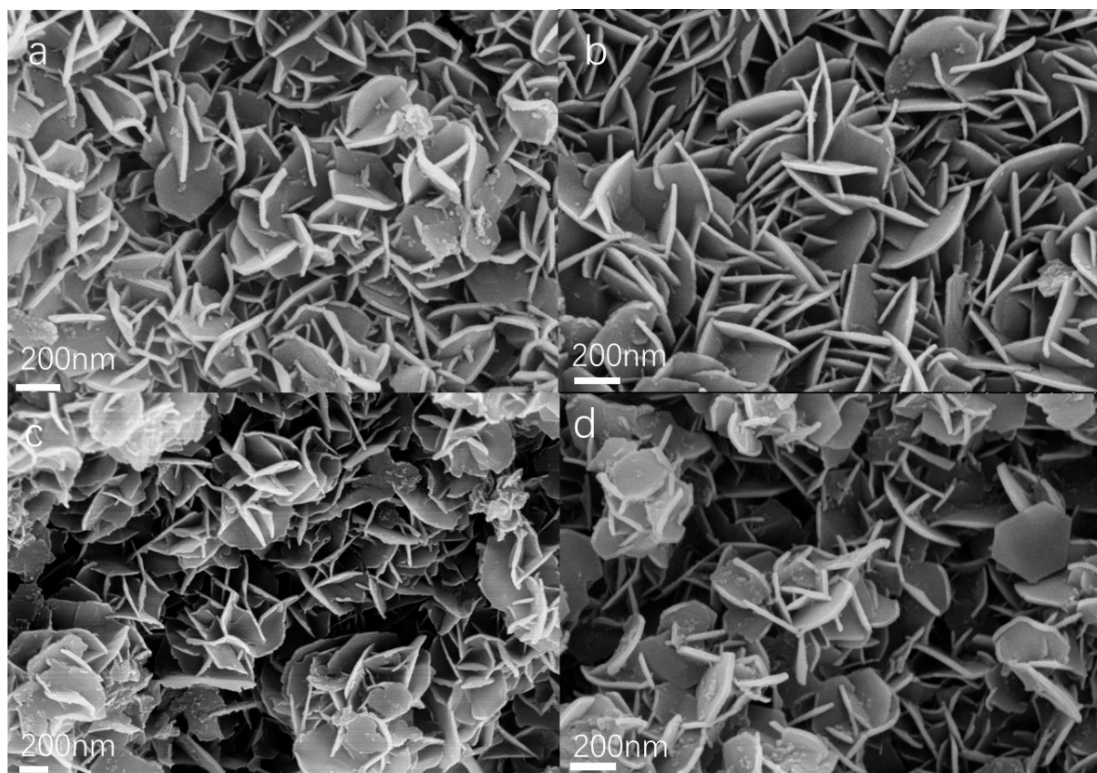

**Fig. S4.** SEM image of NiFe LDH@MOF-1 obtained at different coordination reaction period. (a) 6 h, (b) 8 h, (c) 10 h, and (d) 12 h.

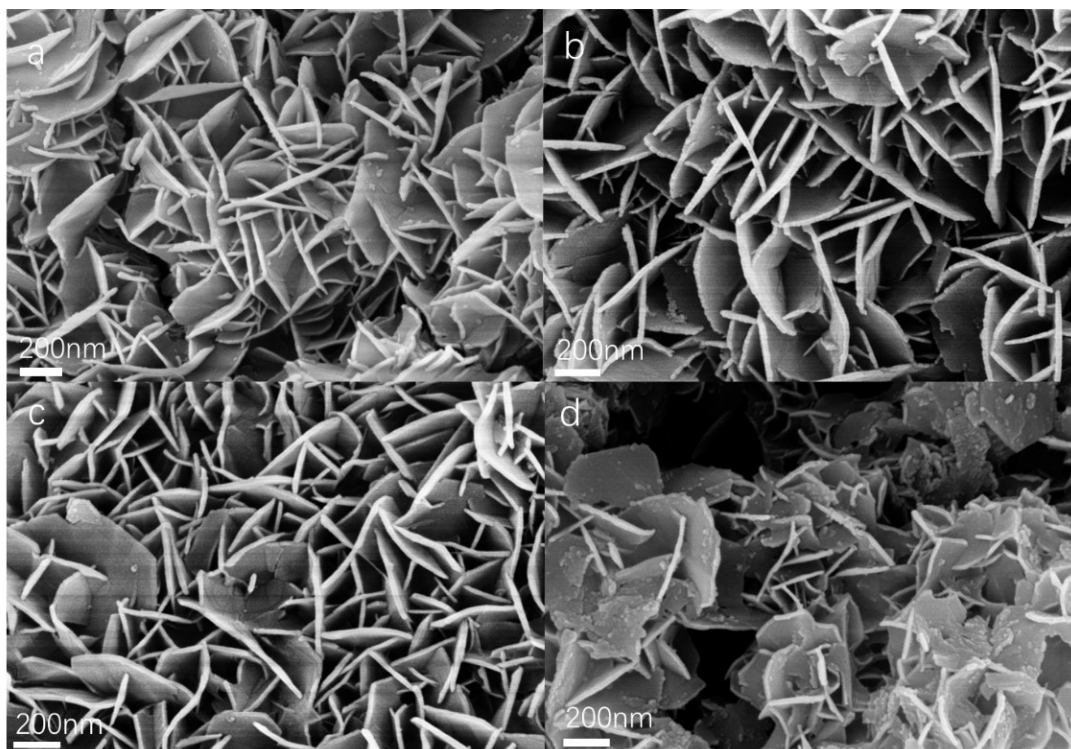

**Fig. S5.** SEM image of NiFe LDH@MOF-2 obtained at different coordination reaction period. (a) 6 h, (b) 8 h, (c) 10 h, and (d) 12 h.

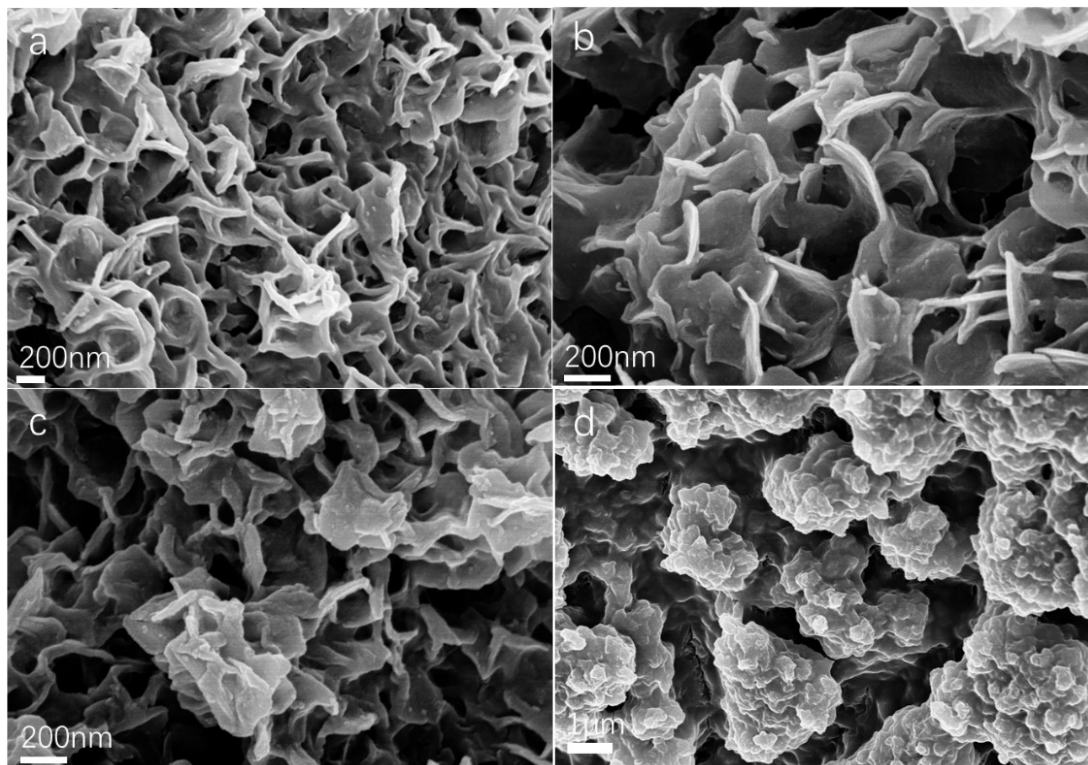

**Fig. S6.** SEM image of NiFe LDH@MOF-3 obtained at different coordination reaction period. (a) 6 h, (b) 8 h, (c) 10 h, and (d) 12 h.

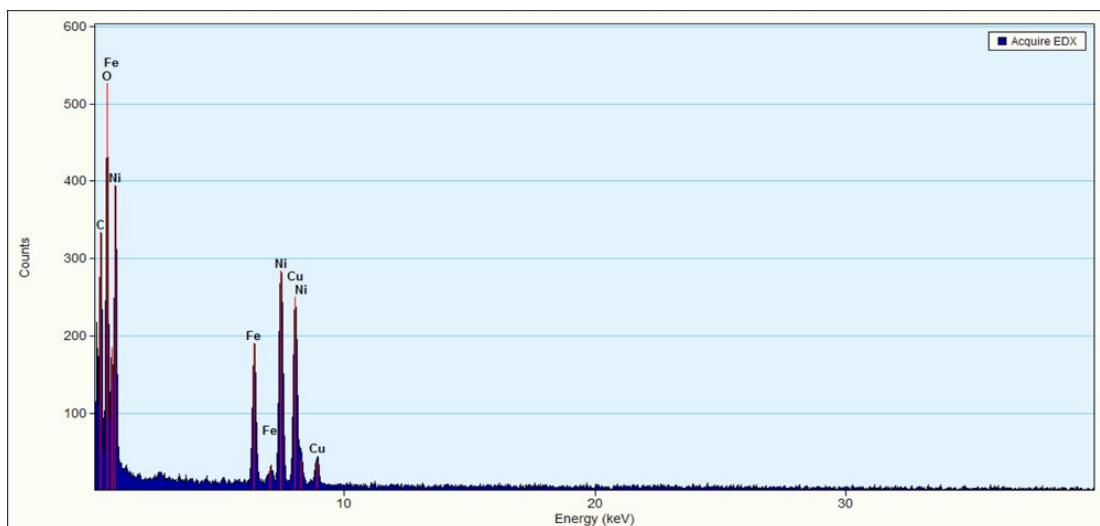

**Fig. S7.** EDX spectrum of NiFe LDH.



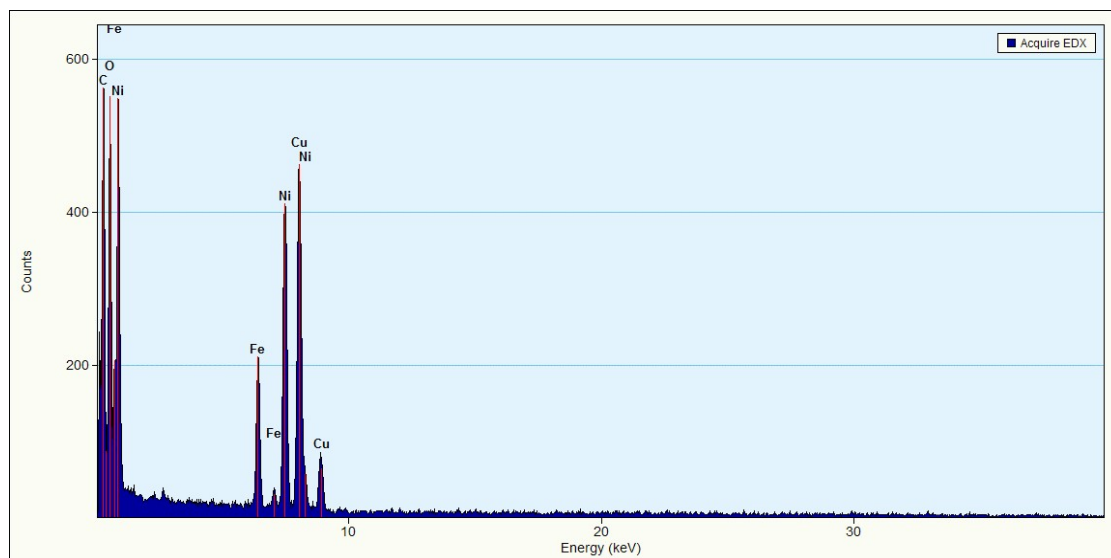

**Fig. S8.** EDX spectrum of NiFe LDH@MOF-1.

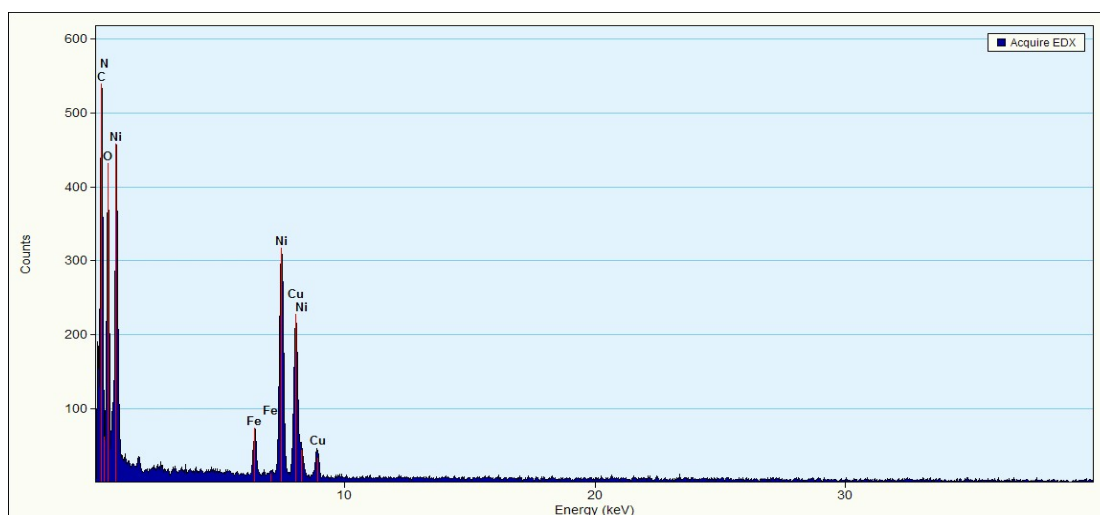

**Fig. S9.** EDX spectrum of NiFe LDH@MOF-2.

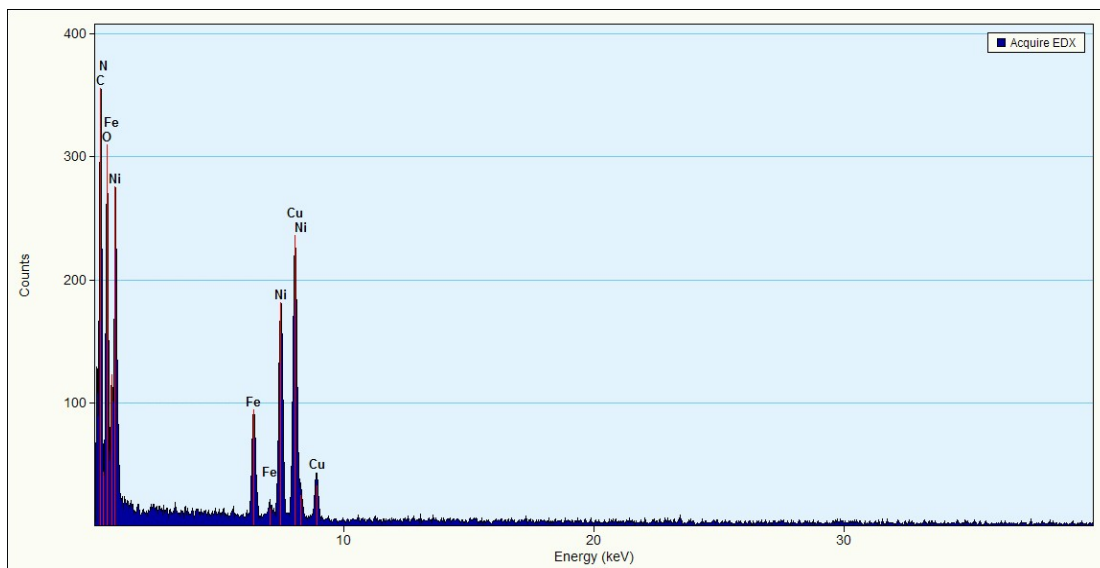

**Fig. S10.** EDX spectrum of NiFe LDH@MOF-3.

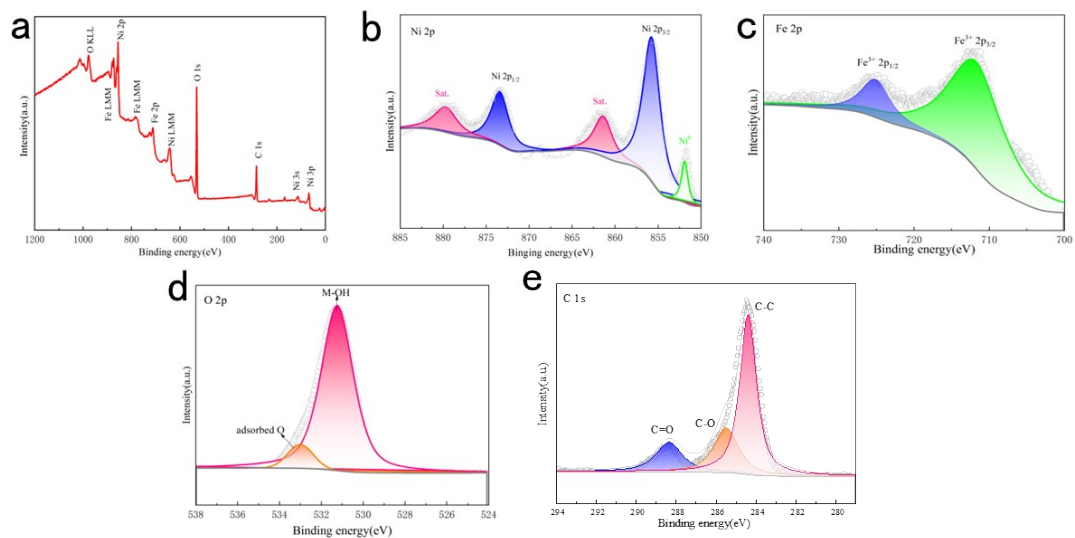

**Fig. S11.** High-resolution XPS spectra of the NiFe LDH (a) Survey spectrum, (b) Ni 2p, (c) Fe 2p, (d) O 1s, (e) C 1s.

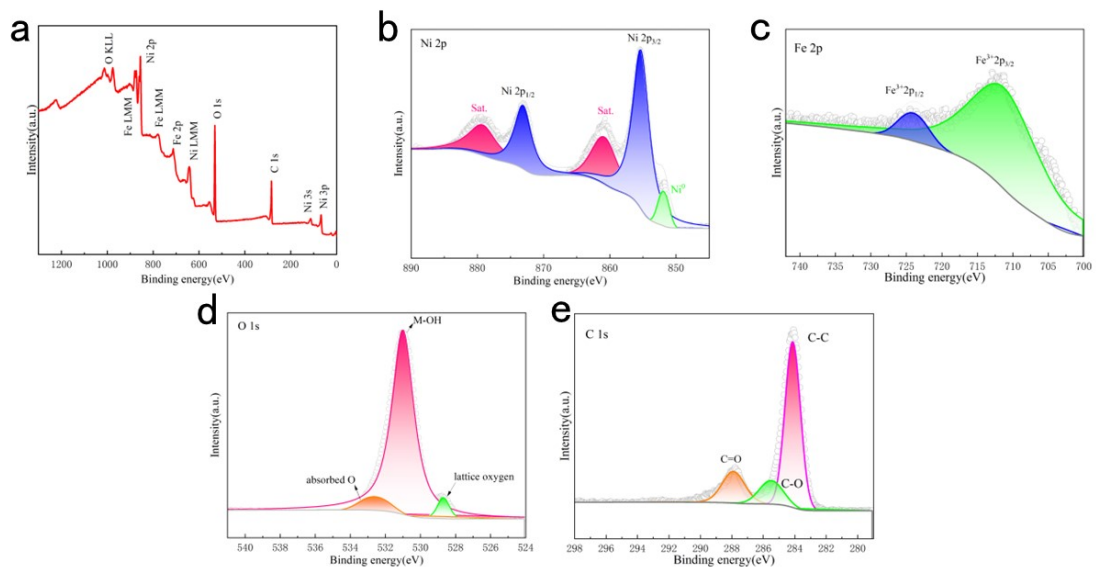

**Fig. S12.** High-resolution XPS spectra of the NiFe LDH@MOF-1 (a) Survey spectrum, (b) Ni 2p, (c) Fe 2p, (d) O 1s, (e) C 1s.

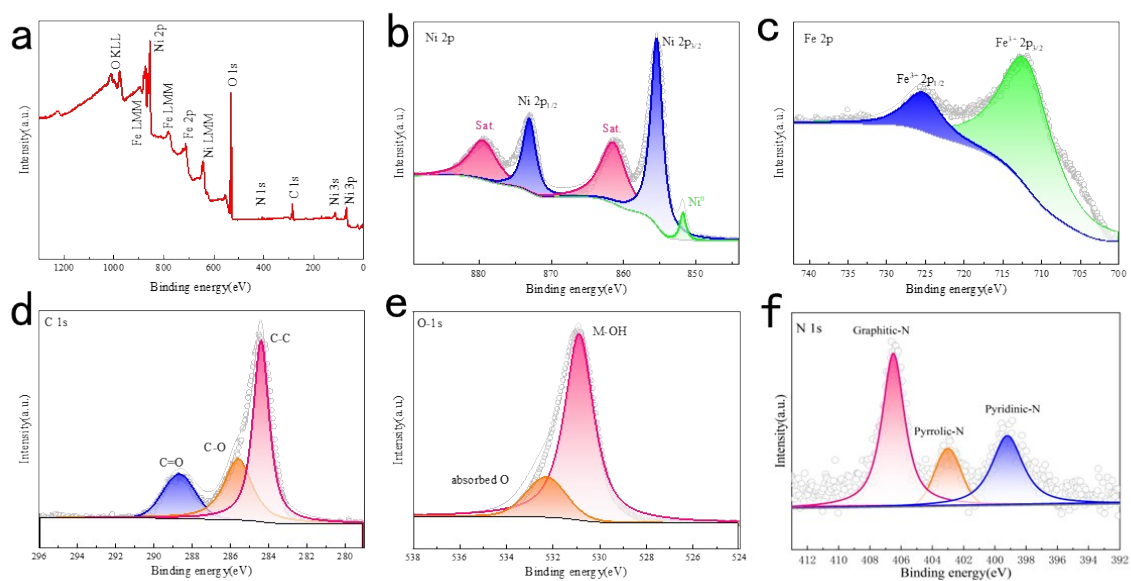

**Fig. S13.** High-resolution XPS spectra of the NiFe LDH@MOF-2 (a) Survey spectrum, (b) Ni 2p, (c) Fe 2p, (d) C 1s, (e) O 1s, (f) N 1s.

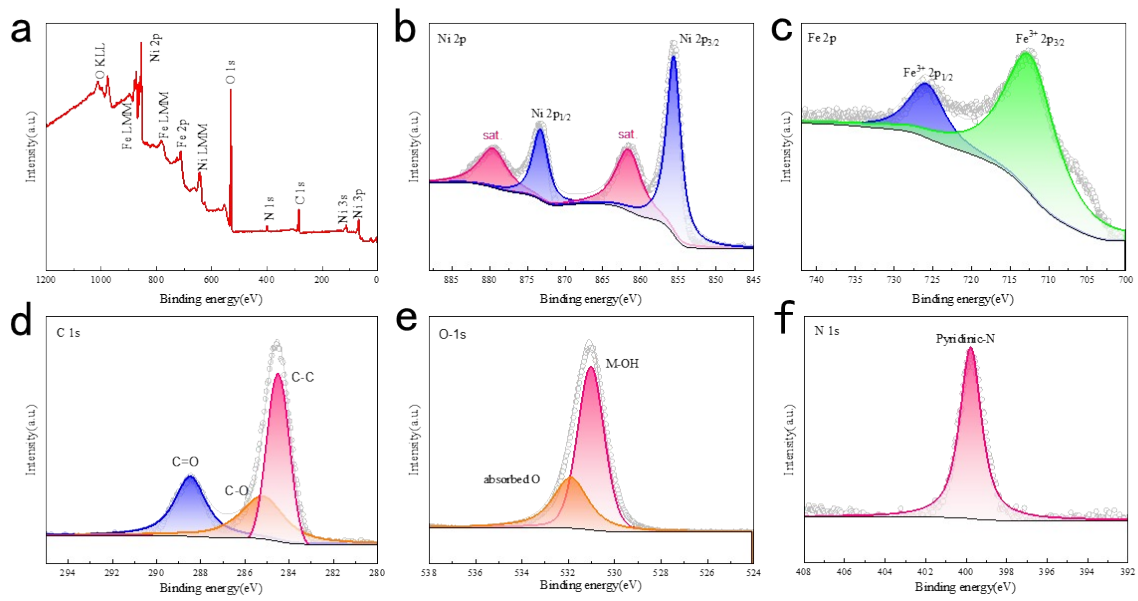

**Fig. S14.** High-resolution XPS spectra of the NiFe LDH@MOF-3 (a) Survey spectrum, (b) Ni 2p, (c) Fe 2p, (d) C 1s, (e) O 1s, (f) N 1s.

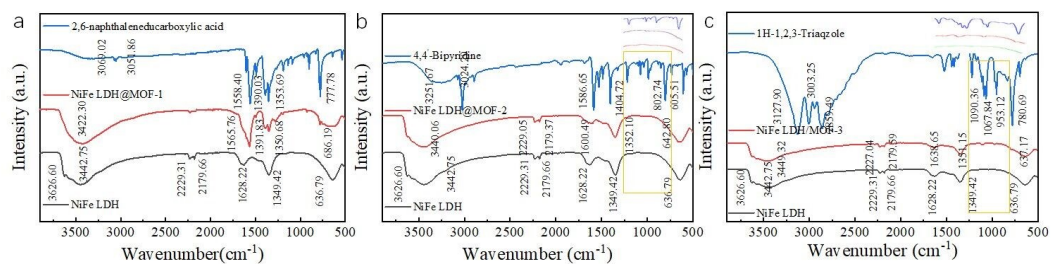

**Fig. S15.** FT-IR spectra of (a) NiFe LDH@MOF-1, (b) NiFe LDH@MOF-2, (c) NiFe LDH@MOF-3.

**Table S1.** Comparison of the OER performance of our NiFe LDH@MOF with other advanced electrocatalysts

| Catalyst                                                               | Electrolyte | Current density (j, mA cm <sup>-2</sup> ) | Overpotential (mV vs. RHE) | References                            |
|------------------------------------------------------------------------|-------------|-------------------------------------------|----------------------------|---------------------------------------|
| NiFe LDH@MOF-1                                                         | 1M KOH      | 100                                       | 266                        | this work                             |
| NiFe LDH@MOF-2                                                         | 1M KOH      | 100                                       | 252                        | this work                             |
| NiFe LDH@MOF-3                                                         | 1M KOH      | 100                                       | 242                        | this work                             |
| 5-cycle NiFe LDH                                                       | 1M KOH      | 50                                        | 259                        | Electrochim. Acta, 389 (2021) 138523. |
| S-NiFe LDH exch 0.005M (NH <sub>4</sub> ) <sub>2</sub> SO <sub>4</sub> | 1M KOH      | 50                                        | 288                        | Chem. Eng. J. 426 (2021) 130873.      |



|                                        |                  |     |       |                                                  |
|----------------------------------------|------------------|-----|-------|--------------------------------------------------|
| <b>NiFe-LDH@OMC/CC</b>                 | 1M KOH           | 100 | 296   | Appl. Surf. Sci. 565 (2021) 150533.              |
| <b>NiFe-LDH@NCP+CB(PV P 0.3)</b>       | 1M KOH           | 10  | 193   | Int. J. Hydrog. Energy, 47 (2022) 19609–19618.   |
| <b>NiFe-LDH/rGO@NF</b>                 | 1M KOH           | 50  | 277   | Int. J. Hydrog. Energy, 47 (2022) 8786–8798.     |
| <b>NiFe LDH-PANI</b>                   | 1M KOH           | 100 | 270   | J. Alloys Compd. 901 (2022) 163510.              |
| <b>Ni<sub>x</sub>Fe<sub>1-x</sub>S</b> | 1M KOH           | 10  | 122   | Appl. Catal. B, 297 (2021) 120453.               |
| <b>Co-CH@NiFe-LDH/NF</b>               | 1M KOH           | 20  | 188   | Appl. Catal. B, 304 (2022) 120937.               |
| <b>NiFe LDH/GQDs</b>                   | 1M KOH           | 10  | 189   | Ultrason Sonochem 76 (2021) 105664.              |
| <b>NiFe LDH/GF</b>                     | 1M KOH           | 50  | 214   | Chem. Eng. J. 422 (2021) 130123.                 |
| <b>NiFe LDH/FeOOH</b>                  | 1M KOH+0.5M NaCl | 100 | 286.2 | Nano Energy, 84 (2021) 105932.                   |
| <b>NiFe LDH@NiFe</b>                   | 1M KOH           | 10  | 201   | Inorg. Chem. 60 (2021) 12703–12708.              |
| <b>NiFeOP</b>                          | 1M KOH           | 10  | 310   | Inorg. Chem. 60 (2021) 17371–17378.              |
| <b>NiFe LDH/NF-36h</b>                 | 1M KOH           | 20  | 231   | ACS Appl. Mater. Interfaces, 4 (2021) 9022–9031. |
| <b>V-NiFe LDH</b>                      | 1M KOH           | 10  | 195   | ACS Sustain. Chem. Eng. 9 (2021) 9436–9443.      |
| <b>Co@NiFe-LDH</b>                     | 1M KOH           | 10  | 253   | CrystEngComm, 24 (2022) 1573–1581.               |
| <b>CoFe@NiFe-200/NF</b>                | 1M KOH           | 10  | 190   | RSC Adv. 11 (2021) 37624–37630.                  |
| <b>v-NiFe LDH</b>                      | 1M KOH           | 50  | 260   | J. Mater. Chem. A 9 (2021) 23697–23702.          |

|                                                             |        |     |     |                                             |
|-------------------------------------------------------------|--------|-----|-----|---------------------------------------------|
| <b>Ni<sup>vac</sup>Fe<sup>vac</sup>-LDH</b>                 | 1M KOH | 100 | 363 | J. Mater. Chem. A 10 (2022) 5244–5254.      |
| <b>NiFe-LDH@Mo-NiS<sub>2</sub>-NiS/NF</b>                   | 1M KOH | 50  | 261 | Appl. Catal. B 253 (2019) 131–139.          |
| <b>NiFe-LDH@Ni-MOF/NF</b>                                   | 1M KOH | 100 | 248 | Nano Energy 81 (2021) 105606.               |
| <b>FeNi LDH/MOF</b>                                         | 1M KOH | 100 | 272 | Angewandte Chemie. 133 (2021) 24817–24824.  |
| <b>NiFe LDH@SnO<sub>2</sub>/NF</b>                          | 1M KOH | 10  | 234 | Mater. Today Energy 23 (2022) 100906.       |
| <b>NiMoP@NiFe-LDH</b>                                       | 1M KOH | 150 | 299 | Mater. Res. Lett. 10 (2022) 88–96.          |
| <b>Ni<sub>5</sub>P<sub>4</sub>/Ni<sub>2</sub>P/NiFe LDH</b> | 1M KOH | 100 | 243 | J. Mater. Chem. A 6 (2018) 13619–13623.     |
| <b>10-NiFe LDH/CNTs</b>                                     | 1M KOH | 10  | 234 | Appl Clay Sci 216 (2022) 106360.            |
| <b>NiFe LDH@ITO</b>                                         | 1M KOH | 10  | 240 | ACS Sustain. Chem. Eng. 9 (2021) 9436–9443. |
| <b>Co<sub>9</sub>S<sub>8</sub>@NiFe LDH</b>                 | 1M KOH | 10  | 220 | J. Mater. Chem. A 9 (2021) 23697–23702.     |

### Electrochemical calculation

A general mechanism for the OER on oxides in alkaline solution can be summarized as follow<sup>1</sup> :

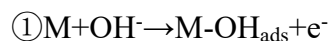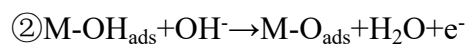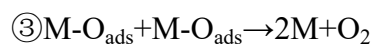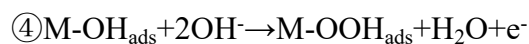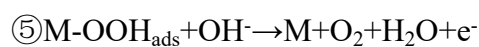

$\textcircled{3}$  has a smaller thermodynamic barrier than the  $\textcircled{4}\textcircled{5}$  process, so  $\textcircled{1}\textcircled{2}\textcircled{3}$  is thermodynamically more favorable.

Calculation of the Turnover Frequency<sup>2</sup> :

$$\text{TOF} = \frac{\frac{\text{Number of total oxygen turnovers}}{\text{cm}^2} \text{ of geometric area}}{\frac{\text{Number of active sites}}{\text{cm}^2} \text{ of geometric area}}$$

The total number of oxygen turnovers per current density :

$$\begin{aligned} \text{No. of } \text{O}_2 &= \frac{\text{mA}}{\text{per cm}^2} \frac{1 \text{C} \cdot \text{s}^{-1}}{(1000 \text{mA})} \frac{1 \text{ mol of e}}{(96485.3 \text{C})} \frac{1 \text{ mol of O}_2}{(4 \text{ mol of e})} \\ &= \frac{6.022 \times 10^{23} \text{ O}_2 \text{ molecules}}{1 \text{ mol of O}_2} \\ &= 1.56 \times 10^{15} \frac{\text{O}_2 \text{ s}^{-1}}{\text{cm}^2} \text{ per } \frac{\text{mA}}{\text{cm}^2} \end{aligned}$$

Using the assumption that either Ni or Fe acts as active site, the active sites per surface area :

$$\begin{aligned} \text{Active sites per ECSA} &= \frac{2 \text{ atoms unit cell}^{-1}}{(182.94 \text{ \AA} \text{ unit cell}^{-1})^{2/3}} \\ &= 4.93 \times 10^{14} \text{ atoms cm}^{-2} \text{ ECSA} \end{aligned}$$

Finally, the plot of current densities is converted into a TOF plot :

$$\begin{aligned} \text{TOF} &= \frac{(1.56 \times 10^{15} \frac{\text{O}_2 \text{ s}^{-1}}{\text{cm}^2} \text{ per } \frac{\text{mA}}{\text{cm}^2}) |j|}{(\text{active sites per surface area}) \times \text{ECSA}} \\ &= \frac{(1.56 \times 10^{15} \frac{\text{O}_2 \text{ s}^{-1}}{\text{cm}^2} \text{ per } \frac{\text{mA}}{\text{cm}^2}) |j|}{(4.93 \times 10^{14} \text{ atoms per ECSA}) \times \text{ECSA}} \end{aligned}$$

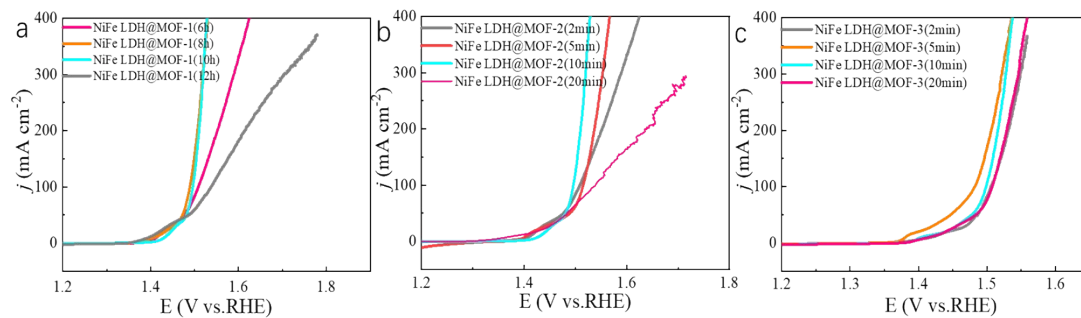

**Fig. S16.** LSV curves of NiFe LDH@MOF-1, NiFe LDH@MOF-2 and NiFe LDH@MOF-3 at different reaction period.

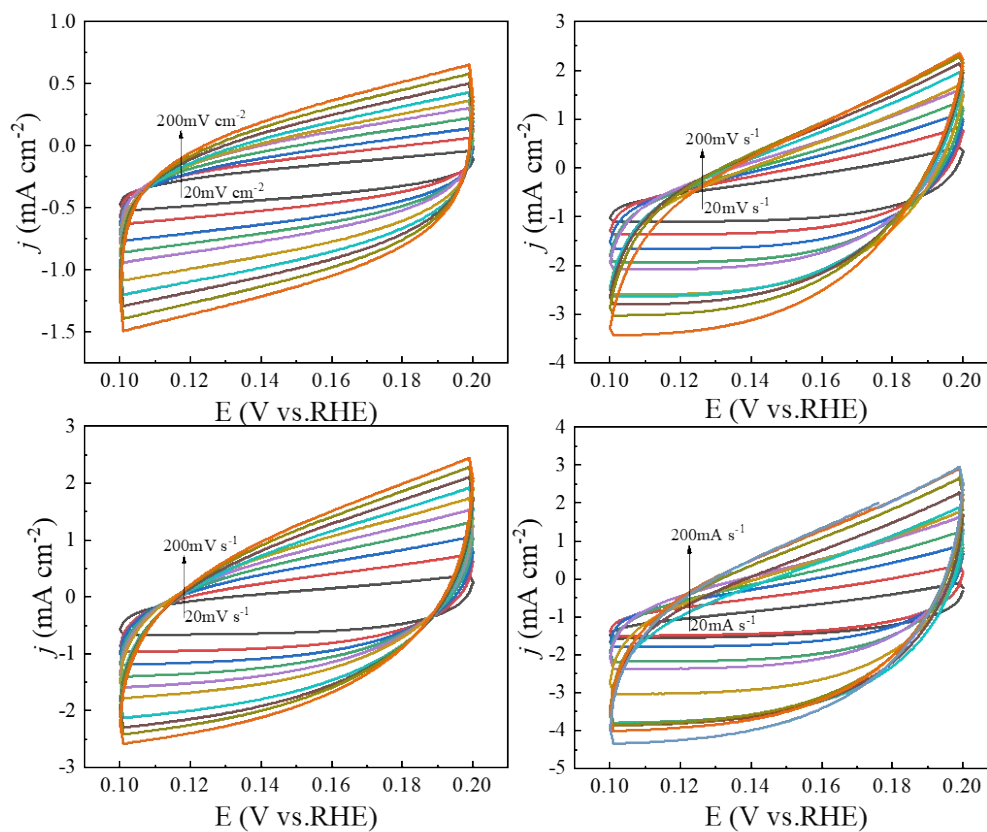

**Fig. S17.** Cyclic voltammetry at potential range without faradaic ion adsorption and desorption process for (a) NiFe LDH, (b) NiFe LDH@MOF-1, (c) NiFe LDH@MOF-2 and (d) NiFe LDH@MOF-3.

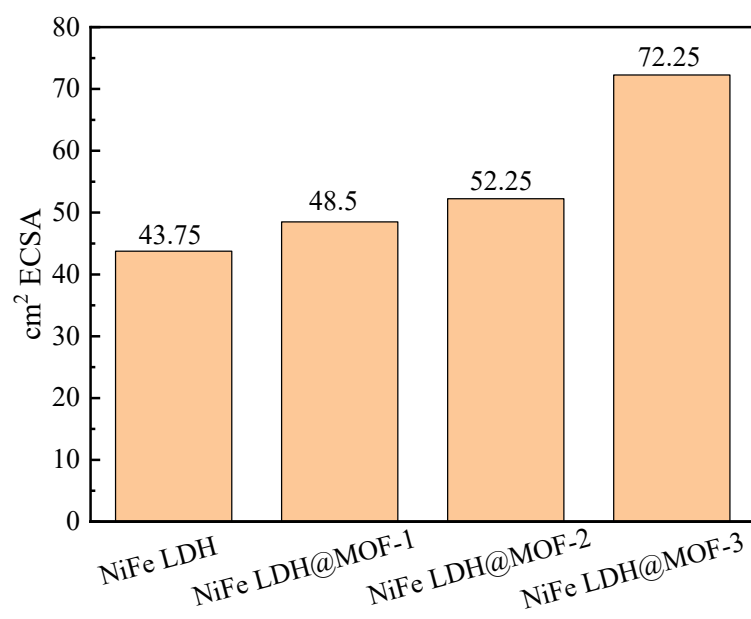

**Fig. S18.** Comparison of the electrochemical active surface area (ECSA) of NiFe LDH and NiFe LDH@MOFs.

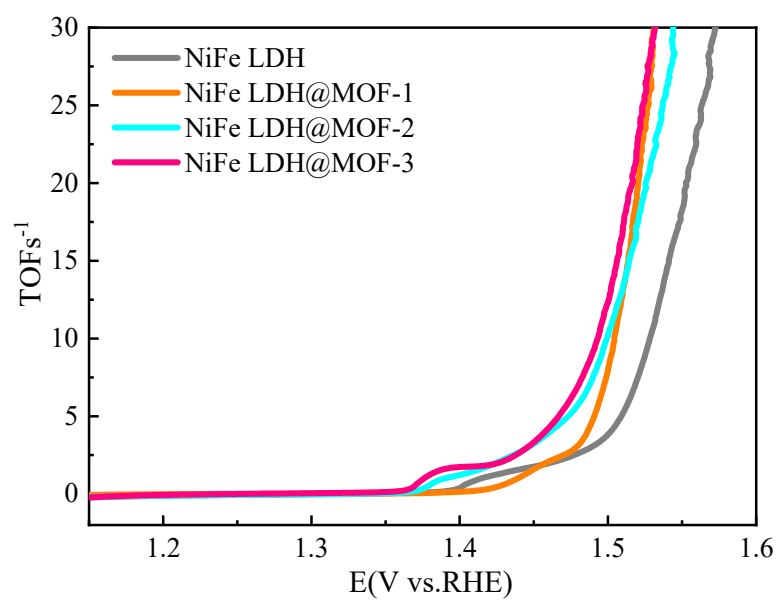

**Fig. S19.** TOF as a function the overpotential for NiFe LDH, NiFe LDH@MOF-1, NiFe LDH@MOF-2 and NiFe LDH@MOF-3.

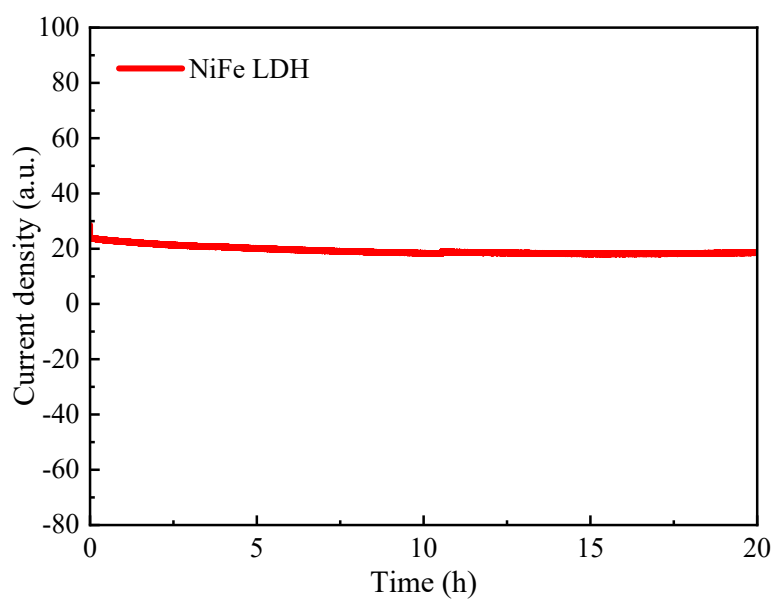

**Fig. S20.** The long-term stability of NiFe LDH.



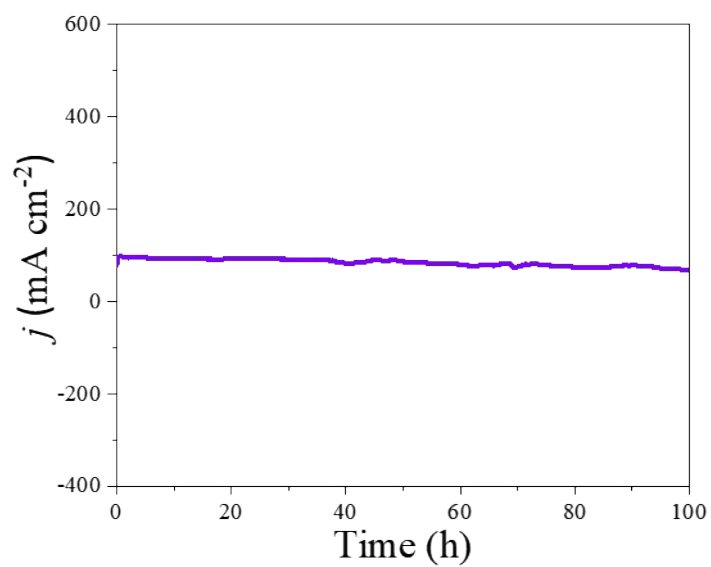

**Fig. S21.** Stability test for NiFe LDH@MOF-3 electrode at constant current density of 100 mA cm<sup>-2</sup> in 1M KOH at 25 °C.

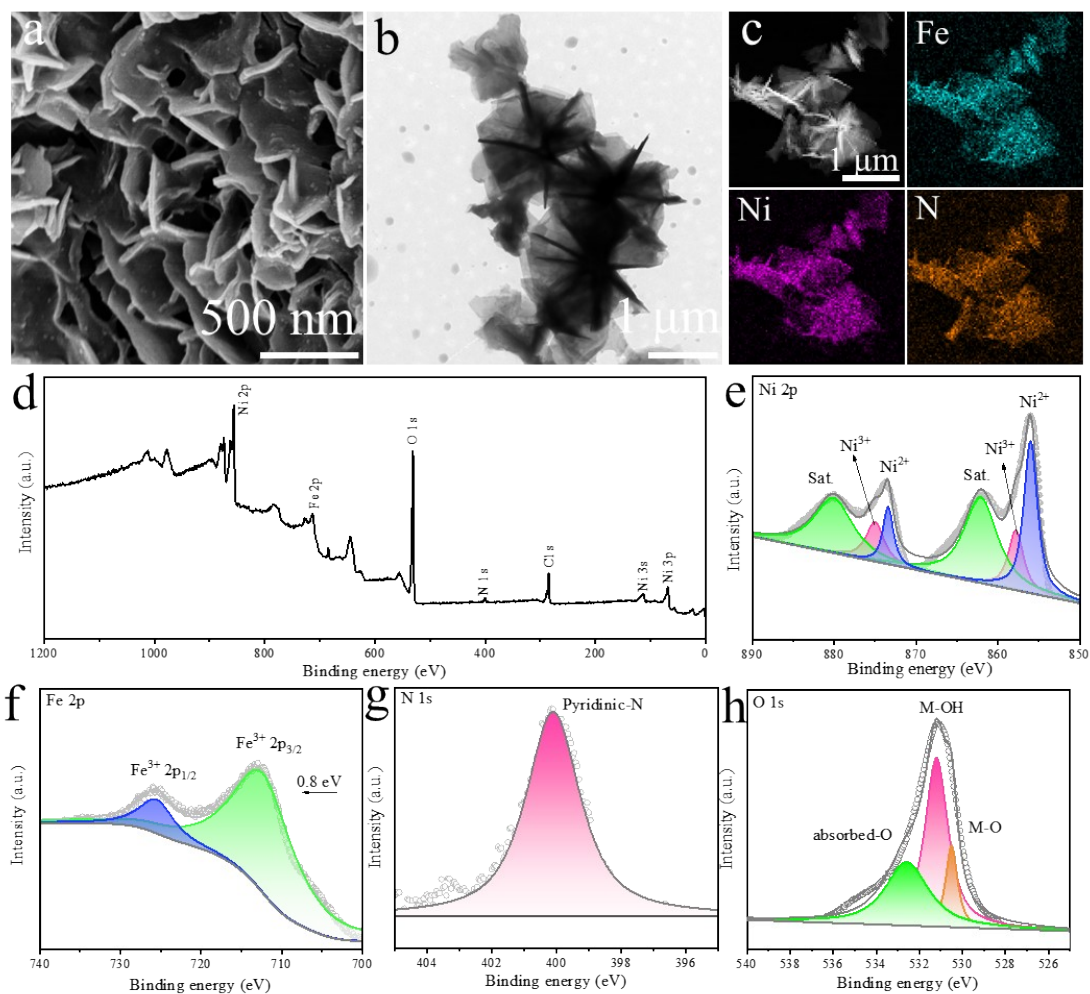

**Fig. S22** (a) SEM image, (b) TEM image, (c) STEM image and elemental mappings, (d) Survey spectrum, (e) Ni 2p, (f) Fe 2p, (g) N 1s, (h) O 1s spectra of NiFe LDH@MOF-3 after OER test.

| [Quantitative Result] |           |           |      |          |         | NiFe LDH |       |        |    |       |        |
|-----------------------|-----------|-----------|------|----------|---------|----------|-------|--------|----|-------|--------|
| Analyte               | Result    | Proc-Calc | Line | Net Int. | BG Int. | Compound | m/m%  | StdErr | El | m/m%  | StdErr |
| NiO                   | 81.9059 % | Quant.-FP | NiKa | 615.237  | 2.711   | NiO      | 63.12 | 0.24   | Ni | 49.60 | 0.19   |
| Fe2O3                 | 18.0941 % | Quant.-FP | FeKa | 205.771  | 1.651   | Fe2O3    | 35.74 | 0.35   | Fe | 24.99 | 0.25   |
| NiFe LDH@MOF-1        |           |           |      |          |         |          |       |        |    |       |        |
| NiFe LDH@MOF-2        |           |           |      |          |         |          |       |        |    |       |        |
| NiFe LDH@MOF-3        |           |           |      |          |         |          |       |        |    |       |        |
| Compound              | m/m%      | StdErr    | El   | m/m%     | StdErr  | Compound | m/m%  | StdErr | El | m/m%  | StdErr |
| NiO                   | 61.59     | 0.24      | Ni   | 48.40    | 0.19    | NiO      | 63.08 | 0.24   | Ni | 49.57 | 0.19   |
| Fe2O3                 | 38.37     | 0.24      | Fe   | 26.83    | 0.17    | Fe2O3    | 36.78 | 0.28   | Fe | 25.73 | 0.20   |

**Fig. S23.** WDXRF data of NiFe LDH, EDXRF data of NiFe LDH@MOF-1, NiFe LDH@MOF-2 and NiFe LDH@MOF-3.

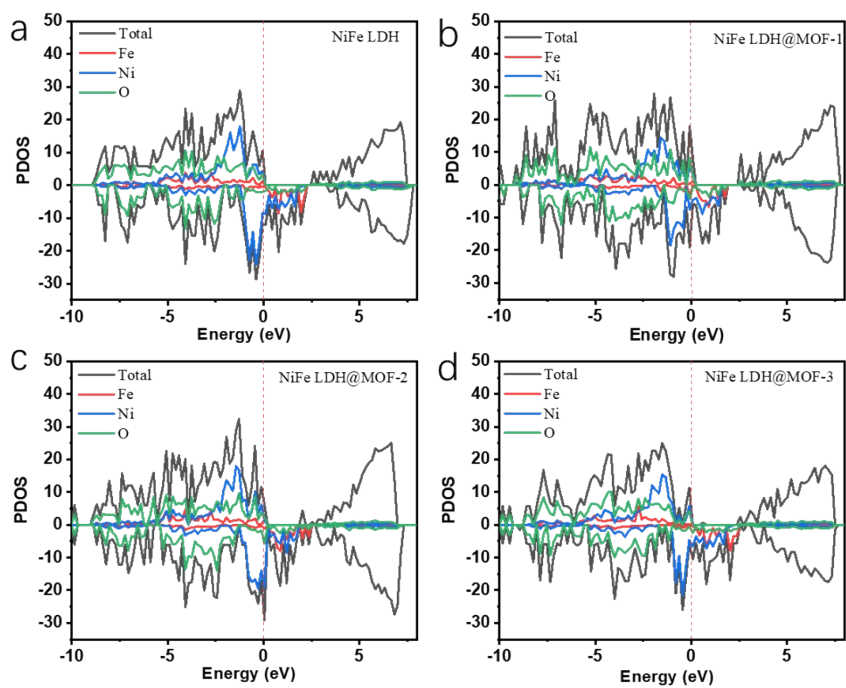

**Fig. S24.** The PDOS of (a) NiFe LDH, (b) NiFe LDH@MOF-1, (c) NiFe LDH@MOF-2, and (d) NiFe LDH@MOF-3.

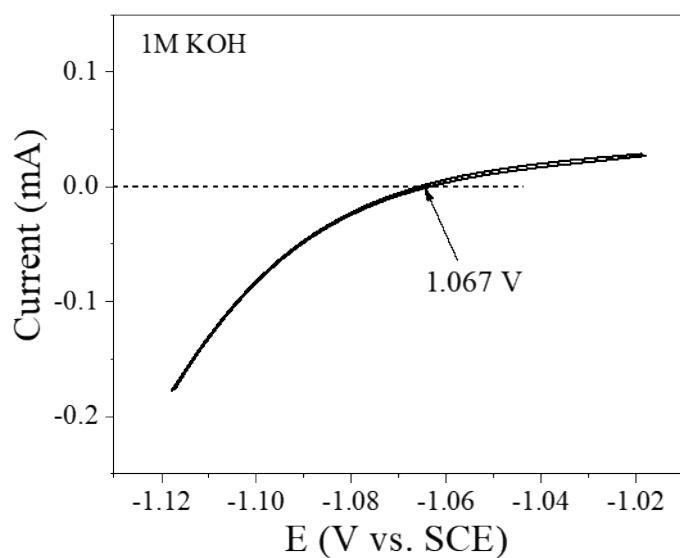

**Fig. S25.** Calibration of SCE reference electrode to RHE (1.0 M KOH).

Calibration of SCE reference electrode with respect to reversible hydrogen electrode (RHE) with a scan rate of 1 mV/s in H<sub>2</sub> saturated 1.0 M KOH electrolyte. The measured value of 1.067 V is closed to the calculated value of 1.068 V.

## References:

- [1] F. Song, M. M. Busch, B. Lassalle-Kaiser, C. S. Hsu, E. Petkucheva, M. Bensimon, H. Chen, C. Corminboeuf, and X. Hu, *ACS Cent. Sci.*, 2019, **5**, 558–568.
- [2] Y. Luo, Y. Wu, D. Wu, C. Huang, D. Xiao, H. Chen, S. Zheng, P. Chu, *ACS Appl. Mater. Interfaces*, 2020, **12**, 42850–42858.
